# Supplementary material for: Build an implanted “arsenal”: detachable microneedles for NIR-triggered cancer photothermo-chemotherapy
Source: Royal Society of Chemistry journal article supplement (doi:10.1039/d1bm00520k), 2021-01-01
Supplement: d1bm00520k1.pdf [file d1bm00520k1.pdf]

## Supporting Information

### Build an Implanted “Arsenal”: Detachable Microneedles for NIR-triggered Cancer Photothermo-chemotherapy

Wei Jiang Yu,<sup>a</sup> Xinfang Li,<sup>a</sup> Yan Huang,<sup>a</sup> Yonghang Chen,<sup>a</sup> Qiang Gao,<sup>a</sup> Youxiang Wang,<sup>a,\*</sup> Jian Ji,<sup>a,\*</sup>

#### Affiliations

<sup>a</sup>MOE Key Laboratory of Macromolecule Synthesis and Functionalization, Department of Polymer Science and Engineering, Zhejiang University, 310027, P. R. China.

*\*Co-corresponding author:* Dr. Youxiang Wang (yx\_wang@zju.edu.cn), and Prof. Jian Ji (jjjian@zju.edu.cn)

#### Photothermal Conversion Efficiency Calculation of PB NCs

To evaluate the photothermal conversion efficiency (PCE), the temperature variations of PB NCs solution (20 µg/mL) were recorded upon 808 nm laser irradiation (1.6 W/cm<sup>2</sup>) for 10 min to achieve the maximum steady-state temperature. Then the solution was naturally cooled to room temperature. Thus, PCE ( $\eta$ ) can be calculated referring to the following Equation (1):

$$\eta = \frac{hA(\Delta T_{max,Mix} - \Delta T_{max,H_2O})}{I(1 - 10^{-A_{808}})} \quad (1)$$

Where  $h$  represents the heat transfer coefficient;  $A$  denotes the surface area of the container,  $\Delta T_{max,Mix}$  (25.4°C) and  $\Delta T_{max,H_2O}$  (3.5°C) indexes the temperature change of the PB NCs solution and solvent (water) at the maximum steady-state temperature, respectively,  $I$  is the laser intensity (1.6 W/cm<sup>2</sup>), and  $A_{808}$  is the absorbance of PB NCs solution at 808 nm (0.31). In this equation,  $hA$  is unknown. To calculate  $hA$ ,  $\theta$  is introduced (2):

$$\theta = \frac{T - T_{Surr}}{T_{Max} - T_{Surr}} \quad (2)$$

Where  $T_{Surr}$  and  $T_{Max}$  represents the environment and maximum temperature during

cooling period. And  $hA$  can be calculated referring to the following Equation (3):

$$t = -\frac{m_s C_w}{hA} \ln(\theta) \quad (3)$$

Where  $m_s$  and  $C_w$  denotes the solution mass (1 g) and heat capacity (4.2 J/g) of pure water, respectively.

According to the Equation (1), the PCE of PB NCs is calculated to be 24.7%.

### Cell Cytotoxicity

The cell viability was determined by CCK-8 assay. To obtain soaking solution, 10 g 0.1wt% PB NCs loaded PCL was soaked in 5 mL PBS for 24 h. KB cells were seeded into a 96-well plate at 8000 cells per well and after 12 h the cell culture medium was replaced with fresh cell culture medium containing different volumes of soaking solution. 48 h later, 20  $\mu$ L of CCK-8 was added to each well for another 4 h. Finally, the formazan absorbance was measured by a microplate Bio-Rad reader (Thermo Fisher Scientific) at 450 nm. Data were presented as average  $\pm$  SD (n = 5).

### Supplementary Figures

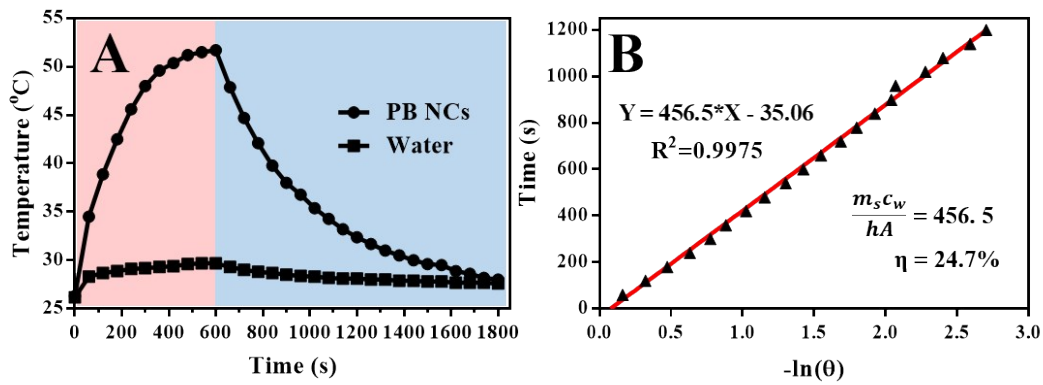

**Fig.S1 Calculation of Photothermal Conversion Efficiency of PB NCs.** (A) The temperature variety of PB NCs solution (20  $\mu$ g/mL) and pure water response to 808 nm NIR irradiation (1.6 W/cm $^2$ ) on and off in period of 1800 s. (B) Linear time data versus  $-\ln(\theta)$  obtained from the cooling period of NIR light off.

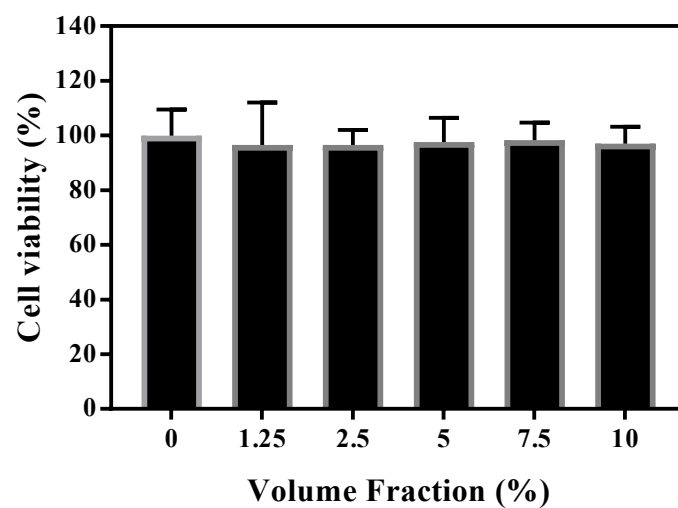

**Fig.S2 Cytotoxicity of KB cells incubated with different volume fraction of soaking solution from 0.1wt% PB NCs loaded PCL.**
